# Supplementary material for: Application of Novel Short Tandem Repeat Typing for Wickerhamomyces anomalus Reveals Simultaneous Outbreaks within a Single Hospital
Source: MDPI journal article supplement (doi:10.3390/microorganisms11061525), 2023-06-08
Supplement: s1 [file s1]

**Tabel S1:** Overview of all isolates with MIC values according to broth microdilution methods. MIC values are in mg/L.

| ID          | Alt. ID    | Country | City       | Hospital Unit           | Date of fungemia | Geno-type | AMB   | FLU | ITC   | VOR   | ISA   | AFG    | MFG    |
|-------------|------------|---------|------------|-------------------------|------------------|-----------|-------|-----|-------|-------|-------|--------|--------|
| 15525       |            | India   | Chandigarh | Neonatal GE ward        | 04-08-2019       | 1         | 0.25  | 1   | 0.12  | 0.03  | NT    | 0.03   | NT     |
| 2064        |            | India   | Chandigarh | Neonatal surgical ICU   | 25-04-2019       | 1         | 0.5   | 2   | 0.12  | 0.03  | NT    | 0.06   | NT     |
| 42327       |            | India   | Chandigarh | Pediatric medicine ward | 06-03-2019       | 2         | 0.25  | 1   | 0.25  | 0.06  | NT    | 0.03   | NT     |
| 16119       |            | India   | Chandigarh | Neonatal GE ward        | 04-08-2019       | 3         | 2     | 4   | 0.5   | 0.12  | NT    | 0.06   | NT     |
| 40251       |            | India   | Chandigarh | Neonatal ward           | 16-02-2019       | 4         | 1     | 1   | 0.5   | 0.06  | NT    | 0.03   | NT     |
| 08-32-01-12 | B-1000     | India   | Chandigarh |                         |                  | 5         | 0.25  | 2   | 0.25  | 0.125 | 0.063 | NT     | 0.016  |
| 08-32-01-15 | B-1140     | India   | Chandigarh |                         |                  | 5         | 0.25  | 2   | 0.25  | 0.125 | 0.063 | NT     | <0.008 |
| 08-32-01-16 | B-1148     | India   | Chandigarh |                         |                  | 5         | 0.25  | 2   | 0.125 | 0.125 | 0.063 | NT     | <0.008 |
| 08-32-01-17 | B-1154     | India   | Chandigarh |                         |                  | 5         | 0.125 | 2   | 0.25  | 0.125 | 0.125 | NT     | 0.016  |
| 08-32-01-27 | B-1247     | India   | Chandigarh |                         |                  | 5         | 0.125 | 2   | 0.25  | 0.125 | 0.063 | NT     | 0.031  |
| 08-32-01-31 | B-1261     | India   | Chandigarh |                         |                  | 5         | 0.125 | 2   | 0.125 | 0.125 | 0.063 | NT     | <0.008 |
| 08-32-01-33 | B-1267     | India   | Chandigarh |                         |                  | 5         | 0.25  | 2   | 0.25  | 0.125 | 0.063 | NT     | 0.016  |
| 08-32-01-34 | B-1287     | India   | Chandigarh |                         |                  | 5         | 0.125 | 2   | 0.25  | 0.125 | 0.063 | NT     | 0.016  |
| 08-32-01-37 | B-1313     | India   | Chandigarh |                         |                  | 5         | 0.25  | 2   | 0.25  | 0.125 | 0.063 | NT     | 0.016  |
| 08-32-01-38 | B-1214     | India   | Chandigarh |                         |                  | 5         | 0.25  | 2   | 0.25  | 0.125 | 0.063 | NT     | 0.016  |
| 10415       |            | India   | Chandigarh | Pediatric surgical ICU  | 28-06-2019       | 5         | 0.5   | 1   | 0.25  | 0.12  | NT    | 0.06   | NT     |
| 14288       |            | India   | Chandigarh | Neonatal Surgical ICU   | 29-07-2019       | 5         | 0.5   | 2   | 0.12  | 0.03  | NT    | 0.06   | NT     |
| 14849       |            | India   | Chandigarh | Pediatric surgical ward | 30-06-2019       | 5         | 0.5   | 2   | 0.25  | 0.12  | NT    | 0.06   | NT     |
| 18454       |            | India   | Chandigarh | Pediatric surgical ward | 30-07-2019       | 5         | 0.25  | 4   | 0.25  | 0.12  | NT    | 0.06   | NT     |
| 41654       |            | India   | Chandigarh | Neonatal ward           | 07-02-2019       | 5         | 0.5   | 4   | 0.5   | 0.12  | NT    | 0.03   | NT     |
| 10-04-08-74 | YFJ002-249 | Unknown | Unknown    |                         |                  | 6         | 0.25  | 2   | 0.063 | 0.125 | NT    | <0.008 | 0.016  |
| 34461       |            | India   | Chandigarh | Neonatal surgical ICU   | 08-01-2019       | 7         | 0.5   | 0.5 | 0.12  | 0.03  | NT    | 0.03   | NT     |
| 34756       |            | India   | Chandigarh | Neonatal surgical ICU   | 07-01-2019       | 7         | 0.25  | 1   | 0.5   | 0.06  | NT    | 0.12   | NT     |
| 35368       |            | India   | Chandigarh | Neonatal ward           | 18-01-2019       | 7         | 1     | 1   | 0.25  | 0.03  | NT    | 0.03   | NT     |
| 40659       |            | India   | Chandigarh | Neonatal surgical ICU   | 20-02-2019       | 7         | 1     | 1   | 0.5   | 0.06  | NT    | 0.03   | NT     |
| 41522       |            | India   | Chandigarh | Neonatal surgical ICU   | 01-03-2019       | 7         | 0.5   | 2   | 0.25  | 0.06  | NT    | 0.06   | NT     |
| 08-32-01-29 | B-1254     | India   | Chandigarh |                         |                  | 8         | 0.125 | 4   | 0.25  | 0.125 | 0.063 | NT     | <0.008 |
| 14278       |            | India   | Chandigarh | Pediatric medicine ward | 29-07-2019       | 9         | NT    | NT  | NT    | NT    | NT    | NT     | NT     |
| 19186       |            | India   | Chandigarh | Neonatal surgical ICU   | 29-08-2019       | 9         | 0.25  | 1   | 0.12  | 0.06  | NT    | 0.12   | NT     |

|             |         |                 |            |                         |            |    |       |    |       |       |       |       |        |
|-------------|---------|-----------------|------------|-------------------------|------------|----|-------|----|-------|-------|-------|-------|--------|
| 20676       |         | India           | Chandigarh | CVTS ICU                | 07-09-2019 | 9  | 0.25  | 1  | 0.25  | 0.06  | NT    | 0.06  | NT     |
| 21241       |         | India           | Chandigarh | CVTS ICU                | 07-09-2019 | 9  | NT    | NT | NT    | NT    | NT    | NT    | NT     |
| 41375       |         | India           | Chandigarh | Neonatal ward           | 01-03-2019 | 9  | 0.5   | 2  | 0.25  | 0.06  | NT    | 0.06  | NT     |
| 41755       |         | India           | Chandigarh | Neonatal ward           | 27-02-2019 | 9  | 0.5   | 1  | 0.25  | 0.06  | NT    | 0.06  | NT     |
| 41973       |         | India           | Chandigarh | Pediatric medicine ward | 19-03-2019 | 9  | 0.25  | 1  | 0.25  | 0.06  | NT    | 0.03  | NT     |
| 43135       |         | India           | Chandigarh | Pediatric medicine ward | 10-03-2019 | 9  | 0.5   | 2  | 0.25  | 0.06  | NT    | 0.06  | NT     |
| 43696       |         | India           | Chandigarh | Pediatric medicine ward | 21-03-2019 | 9  | NT    | NT | NT    | NT    | NT    | NT    | NT     |
| 41825       |         | India           | Chandigarh | Neonatal ward           | 04-03-2019 | 10 | 0.5   | 2  | 0.25  | 0.06  | NT    | 0.03  | NT     |
| 9963        |         | India           | Chandigarh | Neonatal surgical ICU   | 29-06-2019 | 11 | 0.25  | 1  | 0.5   | 0.03  | NT    | 0.03  | NT     |
| 15528       |         | India           | Chandigarh | Neonatal GE ward        | 04-08-2019 | 12 | 0.12  | 2  | 0.25  | 0.06  | NT    | 0.03  | NT     |
| 34092       |         | India           | Chandigarh | Neonatal ward           | 27-12-2018 | 13 | 0.5   | 4  | 1     | 0.03  | NT    | 0.03  | NT     |
| 10-11-08-64 | 7385504 | The Netherlands | Nijmegen   |                         |            | 14 | 0.125 | 1  | 0.125 | 0.063 | 0.063 | 0.016 | 0.008  |
| 35754       |         | India           | Chandigarh | Neonatal ward           | 13-01-2019 | 15 | 0.5   | 1  | 0.25  | 0.031 | NT    | 0.031 | NT     |
| 39100       |         | India           | Chandigarh | Neonatal ward           | 09-02-2019 | 16 | 0.5   | 2  | 0.063 | 0.25  | NT    | 0.063 | NT     |
| 39570       |         | India           | Chandigarh | Neonatal ward           | 15-02-2019 | 17 | 1     | 4  | 0.5   | 0.125 | NT    | 0.063 | NT     |
| 10-08-05-86 | 0268529 | The Netherlands | Nijmegen   |                         |            | 18 | 0.125 | 1  | 0.125 | 0.063 | 0.063 | 0.016 | 0.032  |
| 14839       |         | India           | Chandigarh | Neonatal surgical ICU   | 24-08-2019 | 19 | 0.5   | 4  | 0.5   | 0.12  | NT    | 0.03  | NT     |
| 36375       |         | India           | Chandigarh | Neonatal ward           | 16-01-2019 | 20 | 0.5   | 4  | 0.25  | 0.12  | NT    | 0.03  | NT     |
| 34891       |         | India           | Chandigarh | Neonatal ward           | 04-01-2019 | 21 | 0.25  | 4  | 0.25  | 0.06  | NT    | 0.12  | NT     |
| 35347       |         | India           | Chandigarh | Pediatric medicine ward | 10-01-2019 | 22 | 0.5   | 2  | 0.5   | 0.12  | NT    | 0.06  | NT     |
| 34278       |         | India           | Chandigarh | Neonatal surgical ward  | 06-01-2019 | 23 | 0.25  | 2  | 0.5   | 0.06  | NT    | 0.12  | NT     |
| 36313       |         | India           | Chandigarh | Neonatal ward           | 02-01-2019 | 24 | 0.5   | 2  | 0.5   | 0.12  | NT    | 0.03  | NT     |
| 08-32-01-01 | B-445   | India           | Chandigarh |                         |            | 25 | 0.125 | 2  | 0.25  | 0.125 | 0.063 | NT    | 0.031  |
| 08-32-01-03 | B-539   | India           | Chandigarh |                         |            | 25 | 0.25  | 2  | 0.25  | 0.125 | 0.063 | NT    | <0.008 |
| 08-32-01-04 | B-641   | India           | Chandigarh |                         |            | 25 | 0.063 | 2  | 0.5   | 0.063 | 0.063 | NT    | 0.031  |
| 08-32-01-05 | B-642   | India           | Chandigarh |                         |            | 25 | 0.125 | 4  | 0.25  | 0.125 | 0.063 | NT    | 0.031  |
| 08-32-01-06 | B-689   | India           | Chandigarh |                         |            | 25 | 0.125 | 4  | 0.125 | 0.125 | 0.063 | NT    | 0.016  |
| 08-32-01-07 | B-749   | India           | Chandigarh |                         |            | 25 | 0.25  | 1  | 0.25  | 0.125 | 0.063 | NT    | <0.008 |
| 08-32-01-08 | B-781   | India           | Chandigarh |                         |            | 25 | 0.25  | 2  | 0.25  | 0.125 | 0.063 | NT    | 0.016  |
| 08-32-01-09 | B-874   | India           | Chandigarh |                         |            | 25 | 0.125 | 2  | 0.125 | 0.125 | 0.063 | NT    | <0.008 |
| 08-32-01-10 | B-943   | India           | Chandigarh |                         |            | 25 | 0.25  | 2  | 0.125 | 0.125 | 0.063 | NT    | 0.016  |
| 08-32-01-11 | B-985   | India           | Chandigarh |                         |            | 25 | 0.125 | 4  | 0.125 | 0.125 | 0.063 | NT    | <0.008 |

|             |            |                 |            |                       |            |    |       |    |       |       |       |        |        |
|-------------|------------|-----------------|------------|-----------------------|------------|----|-------|----|-------|-------|-------|--------|--------|
| 08-32-01-13 | B-1125     | India           | Chandigarh |                       |            | 25 | 0.125 | 1  | 0.25  | 0.125 | 0.063 | NT     | 0.016  |
| 08-32-01-14 | B-1126     | India           | Chandigarh |                       |            | 25 | 0.125 | 1  | 0.125 | 0.125 | 0.063 | NT     | <0.008 |
| 08-32-01-18 | B-1157     | India           | Chandigarh |                       |            | 25 | 0.125 | 1  | 0.125 | 0.125 | 0.063 | NT     | <0.008 |
| 08-32-01-19 | B-1178     | India           | Chandigarh |                       |            | 25 | 0.125 | 1  | 0.25  | 0.125 | 0.063 | NT     | <0.008 |
| 08-32-01-20 | B-1179     | India           | Chandigarh |                       |            | 25 | 0.25  | 1  | 0.125 | 0.125 | 0.063 | NT     | <0.008 |
| 08-32-01-21 | B-1198     | India           | Chandigarh |                       |            | 25 | 0.25  | 1  | 0.25  | 0.125 | 0.063 | NT     | 0.016  |
| 08-32-01-22 | B-1199     | India           | Chandigarh |                       |            | 25 | 0.125 | 1  | 0.25  | 0.125 | 0.063 | NT     | <0.008 |
| 08-32-01-23 | B-1201     | India           | Chandigarh |                       |            | 25 | 0.25  | 1  | 0.125 | 0.125 | 0.063 | NT     | 0.016  |
| 08-32-01-24 | B-1220     | India           | Chandigarh |                       |            | 25 | 0.125 | 1  | 0.125 | 0.125 | 0.063 | NT     | 0.016  |
| 08-32-01-25 | B-1240     | India           | Chandigarh |                       |            | 25 | 0.125 | 2  | 0.125 | 0.125 | 0.063 | NT     | 0.016  |
| 08-32-01-26 | B-1241     | India           | Chandigarh |                       |            | 25 | 0.25  | 1  | 0.25  | 0.125 | 0.063 | NT     | <0.008 |
| 08-32-01-28 | B-1252     | India           | Chandigarh |                       |            | 25 | 0.125 | 1  | 0.125 | 0.125 | 0.063 | NT     | 0.016  |
| 08-32-01-32 | B-1264     | India           | Chandigarh |                       |            | 25 | 0.125 | 1  | 0.25  | 0.125 | 0.063 | NT     | 0.031  |
| 08-32-01-35 | B-1288     | India           | Chandigarh |                       |            | 25 | 0.125 | 1  | 0.25  | 0.125 | 0.063 | NT     | 0.016  |
| 08-32-01-36 | B-1303     | India           | Chandigarh |                       |            | 25 | 0.125 | 1  | 0.25  | 0.125 | 0.063 | NT     | 0.016  |
| 08-32-01-39 | B-1316     | India           | Chandigarh |                       |            | 25 | 0.125 | 1  | 0.125 | 0.125 | 0.063 | NT     | 0.016  |
| 08-32-01-02 | B-486      | India           | Chandigarh |                       |            | 26 | 0.125 | 1  | 0.25  | 0.5   | 0.063 | NT     | 0.016  |
| 08-32-01-30 | B-1256     | India           | Chandigarh |                       |            | 27 | 0.125 | 1  | 0.125 | 0.125 | 0.063 | NT     | <0.008 |
| 26329       |            | India           | Chandigarh | Neonatal surgical ICU | 19-10-2019 | 28 | 0.5   | 1  | 0.25  | 0.063 | NT    | 0.06   | NT     |
| 34791       |            | India           | Chandigarh | Neonatal ward         | 03-01-2019 | 29 | 0.5   | 2  | 0.5   | 0.06  | NT    | 0.12   | NT     |
| 27043       |            | India           | Chandigarh | Neonatal surgical ICU | 25-10-2019 | 30 | 0.5   | 2  | 0.5   | 0.12  | NT    | 0.12   | NT     |
| 10-08-05-17 | 4447266    | The Netherlands | Nijmegen   |                       |            | 31 | 0.5   | 1  | 0.063 | 0.063 | 0.063 | 0.016  | 0.016  |
| 10-09-05-80 | CBS 605    | Italy           | Pavia      |                       |            | 32 | 0.016 | 2  | 0.016 | 0.063 | 0.031 | 0.008  | <0.008 |
| 10-07-04-90 | 6515218    | The Netherlands | Nijmegen   |                       |            | 33 | 0.125 | 1  | 0.125 | 0.063 | 0.032 | 0.016  | 0.008  |
| 10-04-14-23 | YFJ002-680 | Unknown         |            |                       |            | 34 | 1     | 2  | 0.125 | 0.125 | 0.125 | <0.008 | <0.008 |
| 10-03-01-56 |            | Qatar           |            |                       |            | 35 | 0.125 | 8  | 0.5   | 0.25  | 0.063 | 0.016  | 0.016  |
| 10-11-09-22 | 4696742    | The Netherlands | Nijmegen   |                       |            | 36 | 0.063 | 16 | 0.063 | 0.125 | 0.063 | 0.008  | <0.008 |
| 10-11-08-65 | 8091490585 | The Netherlands | Nijmegen   |                       |            | 37 | 0.063 | 2  | 0.125 | 0.063 | 0.063 | <0.008 | <0.008 |
| 10-04-06-08 | YFJ002-8   | Unknown         |            |                       |            | 38 | 0.5   | 4  | 0.25  | 0.125 | 0.125 | <0.008 | <0.008 |

AMB, amphotericin B; FLU, fluconazole; ITC, itraconazole; VOR, voriconazole; POS, posaconazole; ISA, isavuconazole; AFG, anidulafungin; MFG, micafungin; NT, not tested; CVTS, cardiovascular and thoracic surgery

**Table S2:** Specificity testing against 14 yeast species.

| Species                         | M3 |   |   | M6 |   |   |
|---------------------------------|----|---|---|----|---|---|
|                                 | a  | b | c | a  | b | c |
| <i>Candida ablicans</i>         | -  | - | - | -  | - | - |
| <i>Candida tropicalis</i>       | -  | - | - | -  | - | - |
| <i>Pichia kudriavzevii</i>      | -  | - | - | -  | - | - |
| <i>Candida lusitaniae</i>       | -  | - | - | -  | - | - |
| <i>Candida glabrata</i>         | -  | - | - | -  | - | - |
| <i>Candida guillermundii</i>    | -  | - | - | -  | - | - |
| <i>Candida auris</i>            | -  | - | - | -  | - | - |
| <i>Candida parapsilosis</i>     | -  | - | - | -  | - | - |
| <i>Candida kefyr</i>            | -  | - | - | -  | - | - |
| <i>Candida haemulonii</i>       | -  | - | - | -  | - | - |
| <i>Kodameae ohmeri</i>          | -  | - | - | -  | - | - |
| <i>Cryptococcus gatti</i>       | -  | - | - | -  | - | - |
| <i>Cryptococcus neoformans</i>  | -  | - | - | -  | - | - |
| <i>Saccharomyces cerevisiae</i> | -  | - | - | -  | - | - |
